# Supplementary material
Source: publisher site journal article supplement (https://www.jstage.jst.go.jp/article/geochemj/48/1/48_2.0286/_supplement/_download/48_2.0286_1.pdf)
Supplement: Supplementary file 1 [file 48_2.0286_1.pdf]

*Supplementary Table S1. Primary productivity ( $\text{gC m}^{-2} \text{ month}^{-1}$ ) estimated in the vicinity of Station 18 off Concepción during 2008 and 2009 using SeaWiFS-MODIS data and average primary productivity estimated in situ between 1987 and 1998 (Daneri et al., 2000).*

| Month \ Years | SeaWiFS-MODIS |      | Average (Daneri et al., 2000) |
|---------------|---------------|------|-------------------------------|
|               | 2008          | 2009 | 1987-1988                     |
| January       | 5.9           | 3.2  | 5.7                           |
| February      | 5.1           | 4.3  | 1.0                           |
| March         | 3.9           | 5.15 | 2.3                           |
| April         | 4.6           | 3.6  | 1.9                           |
| May           | 2.1           | 1.3  | 1.8                           |
| June          | 1.4           | 1.2  | 0.9                           |
| July          | 0.9           | 1.1  | 0.5                           |
| August        | 1.4           | 1.3  | 0.6                           |
| September     | 2.4           | 3.3  | 4.9                           |
| October       | 6.9           | 6.9  | 3.0                           |
| November      | 6.7           | 6.8  | 6.1                           |
| December      | 7.9           | 8.4  | 2.0                           |

*Table S2. Monthly fish landings (tons) in the BioBio Region (Chile) between 2008 and 2009.*

| Month \ Year | 2008    | 2009    |
|--------------|---------|---------|
| January      | 26 594  | 84 431  |
| February     | 199 703 | 174 884 |
| March        | 312 661 | 454 170 |
| April        | 240 062 | 313 713 |
| May          | 179 699 | 130 609 |
| June         | 76 895  | 57 713  |
| July         | 19 275  | 126 648 |
| August       | 10 435  | 38 550  |
| September    | 19 029  | 3 965   |
| October      | 131 996 | 133 704 |
| November     | 52 374  | 89 210  |
| December     | 61 973  | 81 255  |

Table S3. Bottom water (90 m) oxygen ( $\mu\text{M}$ ), solid phase P contents ( $\text{mg P kg}^{-1}$  dry sediment), biogenic P deposition rates ( $P_{\text{fish dep.}}$  in  $\text{mg P m}^{-2} \text{ month}^{-1}$ ) and  $P_{\text{fish}}$  preservation potential (%) estimated for sediments collected from Station 18 off Concepción during 2009.

| Month     | Oxygen | Biogenic P ( $P_{\text{fish}}$ ) | Organic P ( $P_{\text{org}}$ ) | Iron bound P (P-Fe) | $P_{\text{fish. dep.}}$ | Pres% |
|-----------|--------|----------------------------------|--------------------------------|---------------------|-------------------------|-------|
| February  | 5.2    | 190                              | 505                            | 460                 | 15.0                    | 13.9  |
| March     | 1.6    | 234                              | 405                            | 416                 | 18.5                    | 17.1  |
| April     | 5.1    | 175                              | 528                            | 513                 | 13.9                    | 12.8  |
| May       | 6.4    | 295                              | 513                            | 398                 | 23.4                    | 21.5  |
| June      | 11.8   | 91                               | 211                            | 584                 | 7.2                     | 6.6   |
| July      | 2.9    | 379                              | 474                            | 403                 | 30.0                    | 27.6  |
| August    | 15.0   | -                                | -                              | -                   | -                       | -     |
| September | 16.7   | 182                              | 486                            | 445                 | 14.4                    | 13.3  |
